# ANESTHESIOLOGY

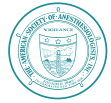

## Cardiac Arrest: Etiology and Outcomes across the Spectrum of Care

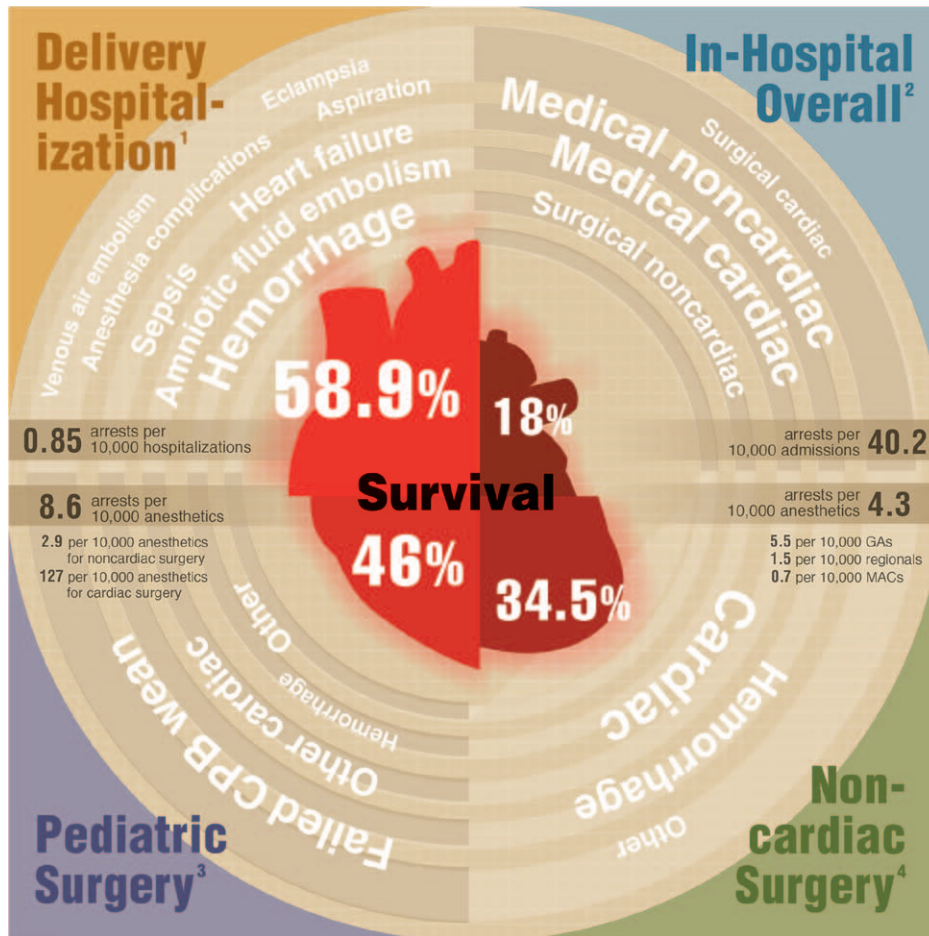

Outcomes following cardiopulmonary arrest in various care settings were derived from published data, with in-hospital arrest rate from a separate source.<sup>5</sup> Each of the four quadrants includes word clouds, where the size of each word is weighted to reflect the incidence of etiology for arrest in that care setting, e.g., the most frequently reported cause for cardiopulmonary arrest in parturients was hemorrhage. Survival reflects survival to hospital discharge. CPB= cardiopulmonary bypass; GA= general anesthesia; MAC= monitored anesthesia care.

Infographic created by Jonathan P. Wanderer, Vanderbilt University School of Medicine, and James P. Rathmell, Massachusetts General Hospital/Harvard Medical School. Illustration by Annemarie Johnson, Vivo Visuals. Address correspondence to Dr. Wanderer: jon.wanderer@vanderbilt.edu.

1. Mhyre JM, Tsen LC, Einav S, Kuklina EV, Leffert LR, Bateman BT: Cardiac arrest during hospitalization for delivery in the United States, 1998–2011. *ANESTHESIOLOGY* 2014; 120:810–8
2. Larkin GL, Copes WS, Nathanson BH, Kaye W: Pre-resuscitation factors associated with mortality in 49,130 cases of in-hospital cardiac arrest: A report from the National Registry for Cardiopulmonary Resuscitation. *Resuscitation* 2010; 81:302–11
3. Flick RP, Sprung J, Harrison TE, Gleich SJ, Schroeder DR, Hanson AC, Buenvenida SL, Warner DO: Perioperative cardiac arrests in children between 1988 and 2005 at a tertiary referral center: A study of 92,881 patients. *ANESTHESIOLOGY* 2007; 106:226–37
4. Sprung J, Warner ME, Contreras MG, Schroeder DR, Beighley CM, Wilson GA, Warner DO: Predictors of survival following cardiac arrest in patients undergoing noncardiac surgery: A study of 518,294 patients at a tertiary referral center. *ANESTHESIOLOGY* 2003; 99:259–69
5. Chen LM, Nallamothu BK, Spertus JA, Li Y, Chan PS; American Heart Association's Get With the Guidelines-Resuscitation (formerly the National Registry of Cardiopulmonary Resuscitation) Investigators: Association between a hospital's rate of cardiac arrest incidence and cardiac arrest survival. *JAMA Intern Med* 2013; 173:1186–95
